# Supplementary material
Source: PubMed Central journal article supplement (PMC9124582)
Supplement: NIHMS1757131-supplement-4.pdf [file NIHMS1757131-supplement-4.pdf]

Supplemental Table 1. Applied Biosystems Primer/Probe Sets

| Gene Symbol     | Gene Name                                                                            | In Vivo Catalog Number | In Vitro Catalog Number |
|-----------------|--------------------------------------------------------------------------------------|------------------------|-------------------------|
| <i>Actb</i>     | $\beta$ -actin                                                                       | Mm00607939_s1          | Mm00607939_s1           |
| <i>18S</i>      | RNA, 18S ribosomal                                                                   | Hs99999901_s1          | Hs99999901_s1           |
| <i>Esrra</i>    | estrogen related receptor alpha                                                      | Mm00433143_m1          | --                      |
| <i>PGC-1a</i>   | peroxisome proliferator-activated receptor gamma coactivator 1-alpha                 | --                     | Mm00447183_m1           |
| <i>Maoa</i>     | monoamine oxidase A                                                                  | Mm00558004_m1          | --                      |
| <i>Maob</i>     | monoamine oxidase B                                                                  | Mm00555412_m1          | Hs01106246_m1           |
| <i>Glut4</i>    | glucose transporter 4                                                                | --                     | Hs00168966_m1           |
| <i>Pepck2</i>   | phosphoenolpyruvate carboxykinase 2                                                  | --                     | Hs00388934_m1           |
| <i>Pvalb</i>    | parvalbumin                                                                          | Mm01195642_m1          | Hs00161045_m1           |
| <i>Syt2</i>     | synaptotagmin 2                                                                      | Mm00436864_m1          | Hs00980604_m1           |
| <i>Cplx1</i>    | complexin 1                                                                          | Mm00514378_m1          | Hs00362510_m1           |
| <i>Nefh</i>     | neurofilament heavy chain                                                            | Mm01191456_m1          | Hs00606024_m1           |
| <i>Nceh1</i>    | neutral cholesterol ester hydrolase 1                                                | Mm00626772_m1          | Hs00736941_m1           |
| <i>Akl</i>      | adenylate kinase 1                                                                   | Mm00445475_m1          | Hs00176119_m1           |
| <i>Inpp5j</i>   | inositol polyphosphate-5-phosphatase J                                               | Mm00552486_m1          | Hs00300155_m1           |
| <i>Pdhal</i>    | pyruvate dehydrogenase E1 alpha 1 subunit                                            | Mm00468675_m1          | Hs01049345_g1           |
| <i>St8sial1</i> | ST8 alpha-N-acetyl-neuraminide alpha-2,8-sialyltransferase 1                         | Mm00456915_m1          | Hs01124289_m1           |
| <i>Stac2</i>    | SH3 and cysteine rich domain 2                                                       | Mm00524631_m1          | Hs00965033_m1           |
| <i>Atp50</i>    | ATP synthase, H <sup>+</sup> transporting, mitochondrial F1 complex, O subunit       | Mm01611862_g1          | Hs00426889_m1           |
| <i>Atp5a1</i>   | ATP synthase, H <sup>+</sup> transporting, mitochondrial F1 complex, alpha subunit 1 | Mm00431960_m1          | Hs00900735_m1           |
| <i>Idh3a</i>    | isocitrate dehydrogenase 3 (NAD <sup>+</sup> ) alpha                                 | Mm00499674_m1          | Hs00194253_m1           |
| <i>Phyh</i>     | phytanoyl-CoA hydroxylase                                                            | Mm00477734_m1          | Hs00196483_m1           |
| <i>Gad1</i>     | glutamate Decarboxylase 1                                                            | Mm04207432_g1          | --                      |
| <i>Gad2</i>     | glutamate Decarboxylase 2                                                            | Mm00484623_m1          | --                      |
