# Supplementary material
Source: PubMed Central journal article supplement (PMC9124582)
Supplement: NIHMS1757131-supplement-5.pdf [file NIHMS1757131-supplement-5.pdf]

**Supplemental Table 2. Descriptive Statistics for Supplemental Figure 1**

| <b>Gene</b>     | <b>Category</b> | <b>Mean</b> | <b>SEM</b> | <b>Median</b> | <b>Percentile: 25%</b> | <b>Percentile:75%</b> |
|-----------------|-----------------|-------------|------------|---------------|------------------------|-----------------------|
| <i>Ppargcla</i> | GABAergic (PV+) | 60.62       | 4.45       | 59.17         | 50.62                  | 70.9                  |
|                 | GABAergic (PV-) | 14.93       | 1.97       | 12.35         | 7.55                   | 25.48                 |
|                 | Glutamatergic   | 10.9        | 0.77       | 9.23          | 6.2                    | 15.27                 |
|                 | Non-neuron      | 1.6         | 0.17       | 1.19          | 0.79                   | 2.22                  |
| <i>Esrra</i>    | GABAergic (PV+) | 11.45       | 0.78       | 11.57         | 9.82                   | 12.97                 |
|                 | GABAergic (PV-) | 4.83        | 0.38       | 5.34          | 3.08                   | 5.95                  |
|                 | Glutamatergic   | 4.08        | 0.17       | 3.89          | 3.22                   | 5.01                  |
|                 | Non-neuron      | 2.42        | 0.21       | 2.18          | 1.09                   | 3.61                  |
| <i>Esrrb</i>    | GABAergic (PV+) | 0.38        | 0.12       | 0.34          | 0                      | 0.68                  |
|                 | GABAergic (PV-) | 0           | 0          | 0             | 0                      | 0                     |
|                 | Glutamatergic   | 0.0089      | 0.0022     | 0             | 0                      | 0.0097                |
|                 | Non-neuron      | 0           | 0          | 0             | 0                      | 0                     |
| <i>Esrrg</i>    | GABAergic (PV+) | 10.84       | 1.67       | 8.99          | 6.71                   | 15.9                  |
|                 | GABAergic (PV-) | 1.4         | 0.17       | 1.42          | 0.73                   | 2.26                  |
|                 | Glutamatergic   | 1.74        | 0.13       | 1.56          | 0.86                   | 2.38                  |
|                 | Non-neuron      | 0.081       | 0.016      | 0             | 0                      | 0.18                  |
| <i>Era</i>      | GABAergic (PV+) | 0           | 0          | 0             | 0                      | 0                     |
|                 | GABAergic (PV-) | 0.31        | 0.08       | 0.059         | 0                      | 0.67                  |
|                 | Glutamatergic   | 0.15        | 0.022      | 0.11          | 0                      | 0.25                  |
|                 | Non-neuron      | 0.026       | 0.0093     | 0             | 0                      | 0                     |
| <i>Sfl</i>      | GABAergic (PV+) | 5.85        | 0.16       | 5.85          | 5.76                   | 6.13                  |
|                 | GABAergic (PV-) | 5.82        | 0.29       | 5.6           | 5.1                    | 6.7                   |
|                 | Glutamatergic   | 6.64        | 0.12       | 6.58          | 5.97                   | 7.18                  |
|                 | Non-neuron      | 7.13        | 0.36       | 6.89          | 5.43                   | 8.89                  |
| <i>Nrfl</i>     | GABAergic (PV+) | 0.99        | 0.13       | 1.02          | 0.78                   | 1.34                  |
|                 | GABAergic (PV-) | 0.67        | 0.088      | 0.68          | 0.35                   | 1.13                  |
|                 | Glutamatergic   | 0.95        | 0.036      | 0.94          | 0.79                   | 1.16                  |
|                 | Non-neuron      | 1.65        | 0.13       | 1.65          | 0.96                   | 2.13                  |
| <i>Ppara</i>    | GABAergic (PV+) | 0           | 0          | 0             | 0                      | 0                     |
|                 | GABAergic (PV-) | 0           | 0          | 0             | 0                      | 0                     |
|                 | Glutamatergic   | 0.0095      | 0.0022     | 0             | 0                      | 0.02                  |
|                 | Non-neuron      | 0.39        | 0.077      | 0.099         | 0                      | 0.64                  |
| <i>Ppard</i>    | GABAergic (PV+) | 0.95        | 0.27       | 0.95          | 0.41                   | 1.61                  |
|                 | GABAergic (PV-) | 0.55        | 0.073      | 0.44          | 0.31                   | 0.83                  |
|                 | Glutamatergic   | 0.6         | 0.04       | 0.55          | 0.34                   | 0.81                  |
|                 | Non-neuron      | 1.44        | 0.14       | 1.08          | 0.81                   | 2.09                  |
| <i>Pparg</i>    | GABAergic (PV+) | 0.52        | 0.097      | 0.56          | 0.47                   | 0.68                  |
|                 | GABAergic (PV-) | 0.22        | 0.048      | 0.17          | 0                      | 0.38                  |
|                 | Glutamatergic   | 0.16        | 0.03       | 0.032         | 0                      | 0.32                  |
|                 | Non-neuron      | 0.0088      | 0.0033     | 0             | 0                      | 0                     |
