# Supplementary material
Source: PubMed Central journal article supplement (PMC9124582)
Supplement: NIHMS1757131-supplement-6.pdf [file NIHMS1757131-supplement-6.pdf]

Supplemental Table 3. Descriptive Statistics for Figure 2

| Gene            | Dose | Mean  | SEM    | Median | Percentile: 25% | Percentile:75% |
|-----------------|------|-------|--------|--------|-----------------|----------------|
| <i>PVALB</i>    | DMSO | 1     | 0.14   | 0.98   | 0.73            | 1.24           |
|                 | 2    | 0.81  | 0.064  | 0.8    | 0.73            | 0.94           |
|                 | 10   | 0.51  | 0.061  | 0.52   | 0.4             | 0.66           |
|                 | 20   | 0.33  | 0.038  | 0.31   | 0.24            | 0.48           |
|                 | 50   | 0.29  | 0.02   | 0.3    | 0.25            | 0.33           |
| <i>SYT2</i>     | DMSO | 1     | 0.088  | 0.99   | 0.87            | 1.22           |
|                 | 2    | 0.87  | 0.12   | 0.77   | 0.65            | 1.15           |
|                 | 10   | 0.49  | 0.1    | 0.41   | 0.29            | 0.65           |
|                 | 20   | 0.57  | 0.1    | 0.48   | 0.35            | 0.69           |
|                 | 50   | 0.37  | 0.036  | 0.38   | 0.31            | 0.44           |
| <i>CPLXI</i>    | DMSO | 1     | 0.13   | 0.96   | 0.67            | 1.34           |
|                 | 2    | 0.77  | 0.16   | 0.72   | 0.48            | 0.96           |
|                 | 10   | 0.63  | 0.086  | 0.69   | 0.42            | 0.84           |
|                 | 20   | 0.35  | 0.036  | 0.37   | 0.27            | 0.42           |
|                 | 50   | 0.52  | 0.058  | 0.54   | 0.4             | 0.61           |
| <i>NEFH</i>     | DMSO | 1     | 0.16   | 0.91   | 0.58            | 1.58           |
|                 | 2    | 1.2   | 0.24   | 1.06   | 0.74            | 1.47           |
|                 | 10   | 0.5   | 0.11   | 0.44   | 0.33            | 0.59           |
|                 | 20   | 0.34  | 0.071  | 0.36   | 0.14            | 0.5            |
|                 | 50   | 0.074 | 0.045  | 0.059  | 0.0039          | 0.16           |
| <i>MAOB</i>     | DMSO | 1     | 0.14   | 0.84   | 1.22            | 0.75           |
|                 | 2    | 1.03  | 0.16   | 0.99   | 0.72            | 1.27           |
|                 | 10   | 0.92  | 0.11   | 0.88   | 0.78            | 1.04           |
|                 | 20   | 0.44  | 0.043  | 0.47   | 0.36            | 0.52           |
|                 | 50   | 0.27  | 0.039  | 0.3    | 0.19            | 0.32           |
| <i>NCEH1</i>    | DMSO | 1     | 0.23   | 0.75   | 0.41            | 1.49           |
|                 | 2    | 0.51  | 0.16   | 0.76   | 0.034           | 0.87           |
|                 | 10   | 0.45  | 0.14   | 0.4    | 0.024           | 0.87           |
|                 | 20   | 0.32  | 0.069  | 0.36   | 0.098           | 0.46           |
|                 | 50   | 0.011 | 0.0025 | 0.013  | 0.0063          | 0.015          |
| <i>AKI</i>      | DMSO | 1     | 0.18   | 1.08   | 0.54            | 1.45           |
|                 | 2    | 0.82  | 0.076  | 0.85   | 0.69            | 1              |
|                 | 10   | 0.56  | 0.088  | 0.6    | 0.31            | 0.75           |
|                 | 20   | 0.41  | 0.065  | 0.39   | 0.28            | 0.49           |
|                 | 50   | 0.36  | 0.03   | 0.34   | 0.31            | 0.42           |
| <i>INPP5J</i>   | DMSO | 1     | 0.16   | 0.9    | 0.64            | 1.37           |
|                 | 2    | 0.76  | 0.22   | 0.51   | 0.25            | 1.09           |
|                 | 10   | 0.56  | 0.13   | 0.59   | 0.17            | 0.87           |
|                 | 20   | 0.63  | 0.091  | 0.57   | 0.46            | 0.88           |
|                 | 50   | 0.17  | 0.04   | 0.16   | 0.099           | 0.25           |
| <i>PDHA1</i>    | DMSO | 1     | 0.16   | 0.97   | 0.61            | 1.37           |
|                 | 2    | 0.73  | 0.068  | 0.71   | 0.55            | 0.95           |
|                 | 10   | 0.51  | 0.096  | 0.52   | 0.3             | 0.69           |
|                 | 20   | 0.5   | 0.048  | 0.48   | 0.37            | 0.62           |
|                 | 50   | 0.49  | 0.061  | 0.48   | 0.38            | 0.61           |
| <i>ST8SL1A1</i> | DMSO | 1     | 0.15   | 0.86   | 0.66            | 1.44           |
|                 | 2    | 0.97  | 0.17   | 0.99   | 0.49            | 1.29           |
|                 | 10   | 0.43  | 0.075  | 0.42   | 0.27            | 0.58           |
|                 | 20   | 0.37  | 0.066  | 0.28   | 0.24            | 0.62           |
|                 | 50   | 0.2   | 0.026  | 0.19   | 0.16            | 0.26           |
| <i>STAC2</i>    | DMSO | 1     | 0.16   | 0.96   | 0.6             | 1.38           |
|                 | 2    | 0.95  | 0.15   | 0.95   | 0.76            | 1.09           |
|                 | 10   | 0.49  | 0.076  | 0.45   | 0.3             | 0.72           |
|                 | 20   | 0.43  | 0.099  | 0.33   | 0.23            | 0.56           |
|                 | 50   | 0.36  | 0.058  | 0.36   | 0.25            | 0.47           |
| <i>ATP5O</i>    | DMSO | 1     | 0.16   | 0.94   | 0.66            | 1.23           |
|                 | 2    | 0.75  | 0.065  | 0.72   | 0.58            | 0.9            |
|                 | 10   | 0.63  | 0.11   | 0.57   | 0.39            | 0.94           |
|                 | 20   | 0.6   | 0.095  | 0.49   | 0.4             | 0.82           |
|                 | 50   | 0.59  | 0.094  | 0.6    | 0.42            | 0.77           |
| <i>ATP5A1</i>   | DMSO | 1     | 0.16   | 0.94   | 0.64            | 1.4            |
|                 | 2    | 0.91  | 0.19   | 0.82   | 0.51            | 1.2            |
|                 | 10   | 0.5   | 0.095  | 0.55   | 0.19            | 0.77           |
|                 | 20   | 0.61  | 0.11   | 0.48   | 0.37            | 0.94           |
|                 | 50   | 0.25  | 0.053  | 0.26   | 0.14            | 0.34           |
| <i>IDH3A</i>    | DMSO | 1     | 0.24   | 0.74   | 0.53            | 1.44           |
|                 | 2    | 0.53  | 0.098  | 0.51   | 0.23            | 0.84           |
|                 | 10   | 0.37  | 0.093  | 0.36   | 0.11            | 0.59           |
|                 | 20   | 0.29  | 0.037  | 0.29   | 0.23            | 0.35           |
|                 | 50   | 0.18  | 0.057  | 0.17   | 0.076           | 0.29           |
| <i>PHYH</i>     | DMSO | 1     | 0.2    | 0.98   | 0.57            | 1.35           |
|                 | 2    | 0.9   | 0.1    | 0.93   | 0.64            | 1.16           |
|                 | 10   | 0.8   | 0.11   | 0.88   | 0.55            | 1.08           |
|                 | 20   | 0.77  | 0.057  | 0.78   | 0.68            | 0.86           |
|                 | 50   | 0.15  | 0.075  | 0.72   | 0.52            | 0.79           |
