# Supplementary material
Source: PubMed Central journal article supplement (PMC9124582)
Supplement: NIHMS1757131-supplement-7.pdf [file NIHMS1757131-supplement-7.pdf]

Supplemental Table 4. Descriptive Statistics for Figure 4

| Gene          | Genotype         | Mean    | SEM      | Median  | Percentile: 25% | Percentile:75% | Gene               | Genotype         | Mean     | SEM      | Median | Percentile: 25% | Percentile:75% |
|---------------|------------------|---------|----------|---------|-----------------|----------------|--------------------|------------------|----------|----------|--------|-----------------|----------------|
| <b>Cortex</b> |                  |         |          |         |                 |                | <b>Hippocampus</b> |                  |          |          |        |                 |                |
| <i>Esrra</i>  | <i>Esrra</i> +/+ | 1       | 0.028    | 0.99    | 0.96            | 1.03           | <i>Esrra</i>       | <i>Esrra</i> +/+ | 1        | 0.033    | 1.02   | 0.88            | 1.07           |
|               | <i>Esrra</i> +/- | 0.49    | 0.028    | 0.49    | 0.46            | 0.52           |                    | <i>Esrra</i> +/- | 0.46     | 0.024    | 0.47   | 0.39            | 0.5            |
|               | <i>Esrra</i> -/- | 0.00015 | 0.000058 | 0.00014 | 0               | 0.0003         |                    | <i>Esrra</i> -/- | 0.000038 | 0.000038 | 0      | 0               | 0.000095       |
| <i>Pvalb</i>  | <i>Esrra</i> +/+ | 1       | 0.032    | 1.02    | 0.91            | 1.13           | <i>Pvalb</i>       | <i>Esrra</i> +/+ | 1        | 0.043    | 0.98   | 0.87            | 1.05           |
|               | <i>Esrra</i> +/- | 1.03    | 0.096    | 0.98    | 0.96            | 1.11           |                    | <i>Esrra</i> +/- | 0.88     | 0.044    | 0.9    | 0.78            | 0.96           |
|               | <i>Esrra</i> -/- | 0.82    | 0.025    | 0.82    | 0.75            | 0.88           |                    | <i>Esrra</i> -/- | 0.78     | 0.03     | 0.76   | 0.73            | 0.83           |
| <i>Syt2</i>   | <i>Esrra</i> +/+ | 1       | 0.032    | 1       | 0.93            | 1.05           | <i>Syt2</i>        | <i>Esrra</i> +/+ | 1        | 0.037    | 1.01   | 0.91            | 1.11           |
|               | <i>Esrra</i> +/- | 0.96    | 0.047    | 0.95    | 0.82            | 1.08           |                    | <i>Esrra</i> +/- | 0.91     | 0.026    | 0.94   | 0.84            | 0.98           |
|               | <i>Esrra</i> -/- | 0.68    | 0.028    | 0.69    | 0.63            | 0.74           |                    | <i>Esrra</i> -/- | 0.61     | 0.032    | 0.6    | 0.54            | 0.68           |
| <i>Cplx1</i>  | <i>Esrra</i> +/+ | 1       | 0.03     | 0.99    | 0.92            | 1.06           | <i>Cplx1</i>       | <i>Esrra</i> +/+ | 1        | 0.042    | 0.98   | 0.92            | 1.1            |
|               | <i>Esrra</i> +/- | 1.05    | 0.034    | 1.03    | 0.99            | 1.1            |                    | <i>Esrra</i> +/- | 1        | 0.025    | 1.01   | 0.95            | 1.06           |
|               | <i>Esrra</i> -/- | 0.88    | 0.025    | 0.88    | 0.83            | 0.94           |                    | <i>Esrra</i> -/- | 0.79     | 0.039    | 0.78   | 0.71            | 0.85           |
| <i>Nefh</i>   | <i>Esrra</i> +/+ | 1       | 0.037    | 0.99    | 0.9             | 1.07           | <i>Nefh</i>        | <i>Esrra</i> +/+ | 1        | 0.037    | 1.01   | 0.91            | 1.12           |
|               | <i>Esrra</i> +/- | 0.99    | 0.067    | 0.93    | 0.84            | 1.06           |                    | <i>Esrra</i> +/- | 0.92     | 0.016    | 0.93   | 0.89            | 0.96           |
|               | <i>Esrra</i> -/- | 0.79    | 0.042    | 0.77    | 0.7             | 0.9            |                    | <i>Esrra</i> -/- | 0.75     | 0.044    | 0.78   | 0.67            | 0.85           |
| <i>Nceh1</i>  | <i>Esrra</i> +/+ | 1       | 0.023    | 0.99    | 0.94            | 1.06           | <i>Nceh1</i>       | <i>Esrra</i> +/+ | 1        | 0.026    | 0.99   | 0.93            | 1.04           |
|               | <i>Esrra</i> +/- | 0.95    | 0.026    | 0.94    | 0.89            | 0.97           |                    | <i>Esrra</i> +/- | 0.95     | 0.027    | 0.94   | 0.89            | 1.03           |
|               | <i>Esrra</i> -/- | 0.86    | 0.025    | 0.85    | 0.8             | 0.92           |                    | <i>Esrra</i> -/- | 0.86     | 0.026    | 0.84   | 0.8             | 0.92           |
| <i>Akl</i>    | <i>Esrra</i> +/+ | 1       | 0.026    | 1       | 0.93            | 1.05           | <i>Akl</i>         | <i>Esrra</i> +/+ | 1        | 0.015    | 0.99   | 0.95            | 1.03           |
|               | <i>Esrra</i> +/- | 1.01    | 0.03     | 1       | 0.96            | 1.07           |                    | <i>Esrra</i> +/- | 0.91     | 0.023    | 0.91   | 0.86            | 0.97           |
|               | <i>Esrra</i> -/- | 0.87    | 0.037    | 0.87    | 0.79            | 0.96           |                    | <i>Esrra</i> -/- | 0.81     | 0.013    | 0.81   | 0.78            | 0.84           |
| <i>Inpp5j</i> | <i>Esrra</i> +/+ | 1       | 0.019    | 1       | 0.94            | 1.06           | <i>Inpp5j</i>      | <i>Esrra</i> +/+ | 1        | 0.029    | 1      | 0.93            | 1.03           |
|               | <i>Esrra</i> +/- | 1.1     | 0.051    | 1.05    | 1               | 1.24           |                    | <i>Esrra</i> +/- | 0.95     | 0.018    | 0.94   | 0.91            | 1.03           |
|               | <i>Esrra</i> -/- | 0.96    | 0.032    | 0.97    | 0.89            | 1.02           |                    | <i>Esrra</i> -/- | 0.92     | 0.013    | 0.93   | 0.89            | 0.93           |
| <i>Pdha1</i>  | <i>Esrra</i> +/+ | 1       | 0.023    | 1.01    | 0.94            | 1.05           | <i>Pdha1</i>       | <i>Esrra</i> +/+ | 1        | 0.034    | 0.98   | 0.93            | 1.12           |
|               | <i>Esrra</i> +/- | 0.94    | 0.057    | 0.97    | 0.88            | 1              |                    | <i>Esrra</i> +/- | 0.87     | 0.058    | 0.89   | 0.77            | 0.97           |
|               | <i>Esrra</i> -/- | 0.77    | 0.023    | 0.76    | 0.73            | 0.83           |                    | <i>Esrra</i> -/- | 0.69     | 0.023    | 0.67   | 0.64            | 0.72           |
| <i>S8sia1</i> | <i>Esrra</i> +/+ | 1       | 0.031    | 1.01    | 0.9             | 1.11           | <i>S8sia1</i>      | <i>Esrra</i> +/+ | 1        | 0.021    | 0.98   | 0.93            | 1.05           |
|               | <i>Esrra</i> +/- | 1       | 0.045    | 1       | 0.9             | 1.03           |                    | <i>Esrra</i> +/- | 0.94     | 0.035    | 0.93   | 0.87            | 1.03           |
|               | <i>Esrra</i> -/- | 0.89    | 0.028    | 0.9     | 0.85            | 0.94           |                    | <i>Esrra</i> -/- | 0.9      | 0.018    | 0.9    | 0.86            | 0.95           |
| <i>Stac2</i>  | <i>Esrra</i> +/+ | 1       | 0.041    | 0.96    | 0.9             | 1.07           | <i>Stac2</i>       | <i>Esrra</i> +/+ | 1        | 0.043    | 0.97   | 0.91            | 1.06           |
|               | <i>Esrra</i> +/- | 0.94    | 0.059    | 0.97    | 0.89            | 1.07           |                    | <i>Esrra</i> +/- | 0.88     | 0.054    | 0.9    | 0.74            | 0.96           |
|               | <i>Esrra</i> -/- | 0.8     | 0.036    | 0.79    | 0.72            | 0.89           |                    | <i>Esrra</i> -/- | 0.81     | 0.032    | 0.79   | 0.75            | 0.9            |
| <i>Atp5o</i>  | <i>Esrra</i> +/+ | 1       | 0.028    | 0.98    | 0.91            | 1.07           | <i>Atp5o</i>       | <i>Esrra</i> +/+ | 1        | 0.019    | 0.99   | 0.95            | 1.04           |
|               | <i>Esrra</i> +/- | 1.1     | 0.063    | 1.16    | 0.92            | 1.19           |                    | <i>Esrra</i> +/- | 0.9      | 0.039    | 0.93   | 0.81            | 0.98           |
|               | <i>Esrra</i> -/- | 0.79    | 0.043    | 0.78    | 0.7             | 0.91           |                    | <i>Esrra</i> -/- | 0.77     | 0.011    | 0.76   | 0.75            | 0.78           |
| <i>Atp5a1</i> | <i>Esrra</i> +/+ | 1       | 0.024    | 1       | 0.95            | 1.09           | <i>Atp5a1</i>      | <i>Esrra</i> +/+ | 1        | 0.029    | 0.99   | 0.93            | 1.06           |
|               | <i>Esrra</i> +/- | 1.03    | 0.04     | 1.03    | 0.93            | 1.13           |                    | <i>Esrra</i> +/- | 0.93     | 0.035    | 0.98   | 0.86            | 0.99           |
|               | <i>Esrra</i> -/- | 0.87    | 0.044    | 0.85    | 0.76            | 0.99           |                    | <i>Esrra</i> -/- | 0.82     | 0.0086   | 0.82   | 0.8             | 0.84           |
| <i>Idh3a</i>  | <i>Esrra</i> +/+ | 1       | 0.026    | 0.99    | 0.95            | 1.07           | <i>Idh3a</i>       | <i>Esrra</i> +/+ | 1        | 0.026    | 0.99   | 0.93            | 1.08           |
|               | <i>Esrra</i> +/- | 0.99    | 0.056    | 0.98    | 0.85            | 1.05           |                    | <i>Esrra</i> +/- | 0.97     | 0.026    | 0.97   | 0.94            | 1.02           |
|               | <i>Esrra</i> -/- | 0.82    | 0.029    | 0.84    | 0.77            | 0.88           |                    | <i>Esrra</i> -/- | 0.81     | 0.018    | 0.81   | 0.77            | 0.86           |
| <i>Phyh</i>   | <i>Esrra</i> +/+ | 1       | 0.02     | 1       | 0.92            | 1.07           | <i>Phyh</i>        | <i>Esrra</i> +/+ | 1        | 0.031    | 0.96   | 0.93            | 1.13           |
|               | <i>Esrra</i> +/- | 1.08    | 0.057    | 1.08    | 0.93            | 1.18           |                    | <i>Esrra</i> +/- | 0.89     | 0.036    | 0.89   | 0.88            | 0.96           |
|               | <i>Esrra</i> -/- | 0.7     | 0.039    | 0.67    | 0.64            | 0.81           |                    | <i>Esrra</i> -/- | 0.64     | 0.019    | 0.66   | 0.59            | 0.68           |
| <i>Gad1</i>   | <i>Esrra</i> +/+ | 1       | 0.026    | 0.98    | 0.94            | 1.08           | <i>Gad1</i>        | <i>Esrra</i> +/+ | 1        | 0.022    | 0.99   | 0.94            | 1.04           |
|               | <i>Esrra</i> +/- | 0.93    | 0.078    | 0.84    | 0.72            | 1.16           |                    | <i>Esrra</i> +/- | 0.96     | 0.034    | 0.99   | 0.86            | 1.02           |
|               | <i>Esrra</i> -/- | 0.98    | 0.067    | 1.04    | 0.78            | 1.1            |                    | <i>Esrra</i> -/- | 0.89     | 0.029    | 0.88   | 0.85            | 0.94           |
| <i>Gad2</i>   | <i>Esrra</i> +/+ | 1       | 0.24     | 0.75    | 0.61            | 1.43           | <i>Gad2</i>        | <i>Esrra</i> +/+ | 1        | 0.031    | 1      | 0.94            | 1.09           |
|               | <i>Esrra</i> +/- | 0.95    | 0.11     | 0.94    | 0.73            | 1.14           |                    | <i>Esrra</i> +/- | 0.9      | 0.056    | 0.98   | 0.75            | 1.01           |
|               | <i>Esrra</i> -/- | 1.92    | 0.62     | 1.33    | 0.81            | 3.18           |                    | <i>Esrra</i> -/- | 0.96     | 0.049    | 0.99   | 0.86            | 1.05           |
