# Supplementary material
Source: PubMed Central journal article supplement (PMC9124582)
Supplement: NIHMS1757131-supplement-8.pdf [file NIHMS1757131-supplement-8.pdf]

Supplemental Table 5. Descriptive Statistics for Figure 5

| Gene            | Genotype         | Mean  | SEM   | Median | Percentile: 25% | Percentile: 75% | Gene              | Genotype         | Mean | SEM   | Median | Percentile: 25% | Percentile: 75% |
|-----------------|------------------|-------|-------|--------|-----------------|-----------------|-------------------|------------------|------|-------|--------|-----------------|-----------------|
| <b>Striatum</b> |                  |       |       |        |                 |                 | <b>Cerebellum</b> |                  |      |       |        |                 |                 |
| <i>Esrra</i>    | <i>Esrra</i> +/+ | 1     | 0.017 | 0.99   | 0.96            | 1.03            | <i>Esrra</i>      | <i>Esrra</i> +/+ | 1    | 0.04  | 1.03   | 0.95            | 1.11            |
|                 | <i>Esrra</i> +/- | 0.63  | 0.044 | 0.64   | 0.5             | 0.77            |                   | <i>Esrra</i> +/- | 0.64 | 0.076 | 0.57   | 0.52            | 0.91            |
|                 | <i>Esrra</i> -/- | 0.093 | 0.012 | 0.097  | 0.066           | 0.12            |                   | <i>Esrra</i> -/- | 0    | 0     | 0      | 0               | 0               |
| <i>Pvalb</i>    | <i>Esrra</i> +/+ | 1     | 0.15  | 0.95   | 0.63            | 1.34            | <i>Pvalb</i>      | <i>Esrra</i> +/+ | 1    | 0.053 | 1      | 0.85            | 1.08            |
|                 | <i>Esrra</i> +/- | 0.85  | 0.12  | 0.8    | 0.63            | 1.1             |                   | <i>Esrra</i> +/- | 1.17 | 0.11  | 1.21   | 0.91            | 1.31            |
|                 | <i>Esrra</i> -/- | 0.61  | 0.062 | 0.59   | 0.5             | 0.74            |                   | <i>Esrra</i> -/- | 0.95 | 0.058 | 0.95   | 0.83            | 1.07            |
| <i>Syt2</i>     | <i>Esrra</i> +/+ | 1     | 0.047 | 1      | 0.87            | 1.12            | <i>Syt2</i>       | <i>Esrra</i> +/+ | 1    | 0.032 | 0.98   | 0.91            | 1.13            |
|                 | <i>Esrra</i> +/- | 0.98  | 0.076 | 1.02   | 0.86            | 1.17            |                   | <i>Esrra</i> +/- | 1.03 | 0.033 | 1.05   | 0.94            | 1.12            |
|                 | <i>Esrra</i> -/- | 1.1   | 0.19  | 1      | 0.76            | 1.48            |                   | <i>Esrra</i> -/- | 0.84 | 0.044 | 0.8    | 0.75            | 0.89            |
| <i>Cplx1</i>    | <i>Esrra</i> +/+ | 1     | 0.099 | 0.97   | 0.74            | 1.24            | <i>Cplx1</i>      | <i>Esrra</i> +/+ | 1    | 0.027 | 1.02   | 0.91            | 1.09            |
|                 | <i>Esrra</i> +/- | 1.06  | 0.15  | 1.19   | 0.93            | 1.33            |                   | <i>Esrra</i> +/- | 1.18 | 0.037 | 1.2    | 1.08            | 1.24            |
|                 | <i>Esrra</i> -/- | 1.5   | 0.26  | 1.5    | 1               | 1.99            |                   | <i>Esrra</i> -/- | 0.91 | 0.04  | 0.91   | 0.82            | 1               |
| <i>Nefh</i>     | <i>Esrra</i> +/+ | 1     | 0.08  | 0.99   | 0.76            | 1.32            | <i>Nefh</i>       | <i>Esrra</i> +/+ | 1    | 0.063 | 1.02   | 0.81            | 1.17            |
|                 | <i>Esrra</i> +/- | 0.91  | 0.2   | 0.98   | 0.56            | 1.3             |                   | <i>Esrra</i> +/- | 1.11 | 0.11  | 0.9    | 0.88            | 1.31            |
|                 | <i>Esrra</i> -/- | 0.87  | 0.11  | 0.8    | 0.71            | 1.09            |                   | <i>Esrra</i> -/- | 0.62 | 0.035 | 0.62   | 0.53            | 0.68            |
| <i>Nceh1</i>    | <i>Esrra</i> +/+ | 1     | 0.044 | 0.99   | 0.88            | 1.14            | <i>Nceh1</i>      | <i>Esrra</i> +/+ | 1    | 0.055 | 1.02   | 0.81            | 1.14            |
|                 | <i>Esrra</i> +/- | 1.01  | 0.071 | 1.03   | 0.87            | 1.22            |                   | <i>Esrra</i> +/- | 1.28 | 0.16  | 1.12   | 0.95            | 1.51            |
|                 | <i>Esrra</i> -/- | 1.24  | 0.17  | 1.16   | 0.99            | 1.47            |                   | <i>Esrra</i> -/- | 0.99 | 0.079 | 0.96   | 0.79            | 1.19            |
| <i>Akl</i>      | <i>Esrra</i> +/+ | 1     | 0.047 | 1.04   | 0.86            | 1.16            | <i>Akl</i>        | <i>Esrra</i> +/+ | 1    | 0.048 | 1.01   | 0.91            | 1.06            |
|                 | <i>Esrra</i> +/- | 1.02  | 0.11  | 1.05   | 0.76            | 1.09            |                   | <i>Esrra</i> +/- | 1.13 | 0.061 | 1.15   | 1.09            | 1.2             |
|                 | <i>Esrra</i> -/- | 0.94  | 0.051 | 0.96   | 0.83            | 1.05            |                   | <i>Esrra</i> -/- | 0.89 | 0.065 | 0.87   | 0.81            | 1.03            |
| <i>Inpp5j</i>   | <i>Esrra</i> +/+ | 1     | 0.052 | 0.95   | 0.93            | 1.1             | <i>Inpp5j</i>     | <i>Esrra</i> +/+ | 1    | 0.037 | 1.01   | 0.92            | 1.1             |
|                 | <i>Esrra</i> +/- | 1.27  | 0.11  | 1.13   | 1.11            | 1.45            |                   | <i>Esrra</i> +/- | 1.22 | 0.1   | 1.2    | 1.05            | 1.51            |
|                 | <i>Esrra</i> -/- | 1.32  | 0.28  | 1.12   | 0.95            | 1.91            |                   | <i>Esrra</i> -/- | 1    | 0.05  | 1.04   | 0.91            | 1.07            |
| <i>Pdha1</i>    | <i>Esrra</i> +/+ | 1     | 0.042 | 1      | 0.9             | 1.1             | <i>Pdha1</i>      | <i>Esrra</i> +/+ | 1    | 0.03  | 1.01   | 0.96            | 1.06            |
|                 | <i>Esrra</i> +/- | 0.98  | 0.069 | 0.99   | 0.8             | 1.13            |                   | <i>Esrra</i> +/- | 1.15 | 0.11  | 1.05   | 1.02            | 1.34            |
|                 | <i>Esrra</i> -/- | 0.78  | 0.053 | 0.79   | 0.66            | 0.89            |                   | <i>Esrra</i> -/- | 0.78 | 0.04  | 0.82   | 0.68            | 0.88            |
| <i>St8sia1</i>  | <i>Esrra</i> +/+ | 1     | 0.059 | 0.97   | 0.88            | 1.18            | <i>St8sia1</i>    | <i>Esrra</i> +/+ | 1    | 0.033 | 1      | 0.92            | 1.1             |
|                 | <i>Esrra</i> +/- | 1.01  | 0.095 | 1.04   | 0.73            | 1.14            |                   | <i>Esrra</i> +/- | 1.15 | 0.093 | 1.1    | 0.96            | 1.41            |
|                 | <i>Esrra</i> -/- | 0.93  | 0.049 | 0.89   | 0.85            | 1.04            |                   | <i>Esrra</i> -/- | 0.91 | 0.051 | 0.94   | 0.82            | 0.99            |
| <i>Stac2</i>    | <i>Esrra</i> +/+ | 1     | 0.11  | 1.01   | 0.65            | 1.2             | <i>Stac2</i>      | <i>Esrra</i> +/+ | 1    | 0.045 | 0.99   | 0.89            | 1.12            |
|                 | <i>Esrra</i> +/- | 0.98  | 0.21  | 0.98   | 0.56            | 1.12            |                   | <i>Esrra</i> +/- | 1.16 | 0.082 | 1.13   | 0.96            | 1.43            |
|                 | <i>Esrra</i> -/- | 0.87  | 0.11  | 0.84   | 0.63            | 1.13            |                   | <i>Esrra</i> -/- | 1.07 | 0.052 | 1.08   | 0.99            | 1.13            |
| <i>Atp5o</i>    | <i>Esrra</i> +/+ | 1     | 0.063 | 0.98   | 0.84            | 1.15            | <i>Atp5o</i>      | <i>Esrra</i> +/+ | 1    | 0.025 | 1.03   | 0.93            | 1.08            |
|                 | <i>Esrra</i> +/- | 0.87  | 0.099 | 0.97   | 0.72            | 1.06            |                   | <i>Esrra</i> +/- | 1.11 | 0.034 | 1.12   | 1.04            | 1.14            |
|                 | <i>Esrra</i> -/- | 0.92  | 0.12  | 0.92   | 0.67            | 1.15            |                   | <i>Esrra</i> -/- | 0.74 | 0.041 | 0.75   | 0.69            | 0.81            |
| <i>Atp5a1</i>   | <i>Esrra</i> +/+ | 1     | 0.05  | 0.92   | 0.9             | 1.1             | <i>Atp5a1</i>     | <i>Esrra</i> +/+ | 1    | 0.044 | 0.99   | 0.91            | 1.12            |
|                 | <i>Esrra</i> +/- | 1.05  | 0.071 | 0.97   | 0.9             | 1.3             |                   | <i>Esrra</i> +/- | 1.2  | 0.095 | 1.2    | 1.05            | 1.35            |
|                 | <i>Esrra</i> -/- | 0.85  | 0.043 | 0.88   | 0.76            | 0.9             |                   | <i>Esrra</i> -/- | 0.85 | 0.049 | 0.86   | 0.76            | 0.98            |
| <i>Idh3a</i>    | <i>Esrra</i> +/+ | 1     | 0.038 | 1      | 0.94            | 1.08            | <i>Idh3a</i>      | <i>Esrra</i> +/+ | 1    | 0.044 | 1      | 0.92            | 1.11            |
|                 | <i>Esrra</i> +/- | 1.04  | 0.098 | 1.04   | 0.84            | 1.15            |                   | <i>Esrra</i> +/- | 1.18 | 0.13  | 1.12   | 0.99            | 1.34            |
|                 | <i>Esrra</i> -/- | 0.93  | 0.04  | 0.94   | 0.84            | 1.01            |                   | <i>Esrra</i> -/- | 0.8  | 0.061 | 0.79   | 0.71            | 0.94            |
| <i>Phyh</i>     | <i>Esrra</i> +/+ | 1     | 0.062 | 0.97   | 0.86            | 1.19            | <i>Phyh</i>       | <i>Esrra</i> +/+ | 1    | 0.028 | 0.99   | 0.95            | 1.08            |
|                 | <i>Esrra</i> +/- | 1.09  | 0.15  | 0.95   | 0.84            | 1.64            |                   | <i>Esrra</i> +/- | 1.19 | 0.077 | 1.15   | 1.06            | 1.39            |
|                 | <i>Esrra</i> -/- | 0.68  | 0.084 | 0.64   | 0.55            | 0.86            |                   | <i>Esrra</i> -/- | 0.74 | 0.04  | 0.76   | 0.67            | 0.81            |
