# Supplementary material
Source: PubMed Central journal article supplement (PMC9124582)
Supplement: NIHMS1757131-supplement-9.pdf [file NIHMS1757131-supplement-9.pdf]

**Supplemental Table 6. Descriptive Statistics for Midbrain**

| <b>Gene</b>    | <b>Genotype</b>  | <b>Mean</b> | <b>SEM</b> | <b>Median</b> | <b>Percentile: 25%</b> | <b>Percentile:75%</b> |
|----------------|------------------|-------------|------------|---------------|------------------------|-----------------------|
| <i>Esrra</i>   | <i>Esrra</i> +/+ | 1           | 0.15       | 0.78          | 0.6                    | 1.37                  |
|                | <i>Esrra</i> +/- | 0.63        | 0.13       | 0.65          | 0.37                   | 0.87                  |
|                | <i>Esrra</i> -/- | 0.0012      | 0.00044    | 0.00098       | 0                      | 0.0021                |
| <i>Pvalb</i>   | <i>Esrra</i> +/+ | 1           | 0.18       | 0.85          | 0.52                   | 1.36                  |
|                | <i>Esrra</i> +/- | 0.99        | 0.17       | 0.76          | 0.7                    | 1.41                  |
|                | <i>Esrra</i> -/- | 0.76        | 0.12       | 0.7           | 0.5                    | 0.83                  |
| <i>Syt2</i>    | <i>Esrra</i> +/+ | 1           | 0.059      | 0.95          | 0.88                   | 1.2                   |
|                | <i>Esrra</i> +/- | 1.12        | 0.12       | 1.12          | 0.87                   | 1.37                  |
|                | <i>Esrra</i> -/- | 0.92        | 0.093      | 0.91          | 0.71                   | 1.09                  |
| <i>Cplx1</i>   | <i>Esrra</i> +/+ | 1           | 0.093      | 0.99          | 0.66                   | 1.34                  |
|                | <i>Esrra</i> +/- | 1.05        | 0.19       | 0.92          | 0.7                    | 1.47                  |
|                | <i>Esrra</i> -/- | 0.91        | 0.091      | 0.88          | 0.7                    | 1.05                  |
| <i>Nefh</i>    | <i>Esrra</i> +/+ | 1           | 0.11       | 0.89          | 0.66                   | 1.31                  |
|                | <i>Esrra</i> +/- | 1.2         | 0.2        | 1.28          | 0.79                   | 1.58                  |
|                | <i>Esrra</i> -/- | 0.83        | 0.056      | 0.82          | 0.67                   | 0.96                  |
| <i>Nceh1</i>   | <i>Esrra</i> +/+ | 1           | 0.1        | 0.84          | 0.71                   | 1.3                   |
|                | <i>Esrra</i> +/- | 1.13        | 0.21       | 1.12          | 0.71                   | 1.56                  |
|                | <i>Esrra</i> -/- | 0.98        | 0.051      | 0.98          | 0.85                   | 1.07                  |
| <i>Akl</i>     | <i>Esrra</i> +/+ | 1           | 0.11       | 0.87          | 0.73                   | 1.24                  |
|                | <i>Esrra</i> +/- | 1.08        | 0.12       | 1.04          | 0.88                   | 1.29                  |
|                | <i>Esrra</i> -/- | 0.93        | 0.047      | 0.9           | 0.83                   | 1.04                  |
| <i>Inpp5j</i>  | <i>Esrra</i> +/+ | 1           | 0.13       | 0.83          | 0.64                   | 1.3                   |
|                | <i>Esrra</i> +/- | 1.09        | 0.18       | 1.07          | 0.7                    | 1.47                  |
|                | <i>Esrra</i> -/- | 0.84        | 0.062      | 0.78          | 0.68                   | 1                     |
| <i>Pdha1</i>   | <i>Esrra</i> +/+ | 1           | 0.1        | 0.84          | 0.75                   | 1.24                  |
|                | <i>Esrra</i> +/- | 1.25        | 0.22       | 1.13          | 0.87                   | 1.68                  |
|                | <i>Esrra</i> -/- | 0.92        | 0.046      | 0.87          | 0.81                   | 1.05                  |
| <i>St8sia1</i> | <i>Esrra</i> +/+ | 1           | 0.1        | 0.89          | 0.71                   | 1.3                   |
|                | <i>Esrra</i> +/- | 1.17        | 0.16       | 1.1           | 0.89                   | 1.49                  |
|                | <i>Esrra</i> -/- | 0.99        | 0.064      | 0.98          | 0.83                   | 1.18                  |
| <i>Stac2</i>   | <i>Esrra</i> +/+ | 1           | 0.11       | 0.91          | 0.7                    | 1.22                  |
|                | <i>Esrra</i> +/- | 1.06        | 0.15       | 0.9           | 0.78                   | 1.41                  |
|                | <i>Esrra</i> -/- | 0.75        | 0.078      | 0.78          | 0.6                    | 0.94                  |
| <i>Atp5o</i>   | <i>Esrra</i> +/+ | 1           | 0.083      | 0.95          | 0.74                   | 1.26                  |
|                | <i>Esrra</i> +/- | 1.04        | 0.087      | 1.03          | 0.85                   | 1.23                  |
|                | <i>Esrra</i> -/- | 0.89        | 0.041      | 0.87          | 0.8                    | 0.94                  |
| <i>Atp5a1</i>  | <i>Esrra</i> +/+ | 1           | 0.11       | 0.8           | 0.71                   | 1.4                   |
|                | <i>Esrra</i> +/- | 1.17        | 0.2        | 0.99          | 0.85                   | 1.59                  |
|                | <i>Esrra</i> -/- | 0.93        | 0.051      | 0.88          | 0.82                   | 1.06                  |
| <i>Idh3a</i>   | <i>Esrra</i> +/+ | 1           | 0.08       | 0.96          | 0.81                   | 1.1                   |
|                | <i>Esrra</i> +/- | 1.35        | 0.22       | 1.15          | 0.96                   | 1.84                  |
|                | <i>Esrra</i> -/- | 0.99        | 0.054      | 0.98          | 0.86                   | 1.16                  |
| <i>Phyh</i>    | <i>Esrra</i> +/+ | 1           | 0.11       | 0.87          | 0.7                    | 1.26                  |
|                | <i>Esrra</i> +/- | 1.13        | 0.16       | 0.97          | 0.85                   | 1.49                  |
|                | <i>Esrra</i> -/- | 0.8         | 0.037      | 0.77          | 0.69                   | 0.92                  |
