# Supplementary material
Source: PubMed Central journal article supplement (PMC9124582)
Supplement: NIHMS1757131-supplement-10.pdf [file NIHMS1757131-supplement-10.pdf]

**Supplemental Table 7. Descriptive Statistics for MAOs**

| <b>Gene</b> | <b>Region</b> | <b>Genotype</b>  | <b>Mean</b> | <b>SEM</b> | <b>Median</b> | <b>Percentile: 25%</b> | <b>Percentile:75%</b> |
|-------------|---------------|------------------|-------------|------------|---------------|------------------------|-----------------------|
| <i>Maoa</i> | Cortex        | <i>Esrra</i> +/+ | 1           | 0.035      | 0.99          | 0.93                   | 1.04                  |
|             |               | <i>Esrra</i> +/- | 0.95        | 0.045      | 0.9           | 0.88                   | 1.1                   |
|             |               | <i>Esrra</i> -/- | 0.99        | 0.064      | 0.92          | 0.87                   | 1.17                  |
|             | Hippocampus   | <i>Esrra</i> +/+ | 1           | 0.075      | 0.97          | 0.76                   | 1.2                   |
|             |               | <i>Esrra</i> +/- | 0.78        | 0.078      | 0.86          | 0.5                    | 0.94                  |
|             |               | <i>Esrra</i> -/- | 0.86        | 0.074      | 0.9           | 0.69                   | 1.01                  |
|             | Striatum      | <i>Esrra</i> +/+ | 1           | 0.073      | 0.96          | 0.78                   | 1.22                  |
|             |               | <i>Esrra</i> +/- | 1.24        | 0.23       | 0.98          | 0.9                    | 1.68                  |
|             |               | <i>Esrra</i> -/- | 0.99        | 0.059      | 1.02          | 0.86                   | 1.11                  |
|             | Cerebellum    | <i>Esrra</i> +/+ | 1           | 0.068      | 1.01          | 0.81                   | 1.16                  |
|             |               | <i>Esrra</i> +/- | 1.16        | 0.13       | 1.15          | 0.92                   | 1.34                  |
|             |               | <i>Esrra</i> -/- | 0.98        | 0.073      | 0.99          | 0.88                   | 1.09                  |
|             | Midbrain      | <i>Esrra</i> +/+ | 1           | 0.09       | 0.87          | 0.81                   | 1.05                  |
|             |               | <i>Esrra</i> +/- | 1.31        | 0.25       | 1.11          | 0.87                   | 1.85                  |
|             |               | <i>Esrra</i> -/- | 1.21        | 0.099      | 1.15          | 1.01                   | 1.48                  |
| <i>Maob</i> | Cortex        | <i>Esrra</i> +/+ | 1           | 0.02       | 1.01          | 0.99                   | 1.04                  |
|             |               | <i>Esrra</i> +/- | 0.97        | 0.056      | 0.99          | 0.91                   | 1.1                   |
|             |               | <i>Esrra</i> -/- | 0.96        | 0.055      | 0.91          | 0.87                   | 1.1                   |
|             | Hippocampus   | <i>Esrra</i> +/+ | 1           | 0.043      | 0.98          | 0.85                   | 1.16                  |
|             |               | <i>Esrra</i> +/- | 0.84        | 0.055      | 0.83          | 0.67                   | 0.99                  |
|             |               | <i>Esrra</i> -/- | 0.93        | 0.052      | 0.92          | 0.81                   | 1.02                  |
|             | Striatum      | <i>Esrra</i> +/+ | 1           | 0.036      | 1             | 0.89                   | 1.05                  |
|             |               | <i>Esrra</i> +/- | 1.18        | 0.12       | 1.15          | 0.98                   | 1.4                   |
|             |               | <i>Esrra</i> -/- | 1.07        | 0.05       | 1.08          | 0.97                   | 1.17                  |
|             | Cerebellum    | <i>Esrra</i> +/+ | 1           | 0.056      | 0.97          | 0.83                   | 1.16                  |
|             |               | <i>Esrra</i> +/- | 1.08        | 0.067      | 1.04          | 0.96                   | 1.24                  |
|             |               | <i>Esrra</i> -/- | 0.91        | 0.076      | 0.88          | 0.7                    | 1.13                  |
|             | Midbrain      | <i>Esrra</i> +/+ | 1           | 0.058      | 0.98          | 0.82                   | 1.08                  |
|             |               | <i>Esrra</i> +/- | 1.18        | 0.14       | 1.16          | 0.88                   | 1.49                  |
|             |               | <i>Esrra</i> -/- | 1.23        | 0.13       | 1.17          | 0.98                   | 1.28                  |
