# Supplementary material
Source: PubMed Central journal article supplement (PMC9124582)

**A** *Pparg1a*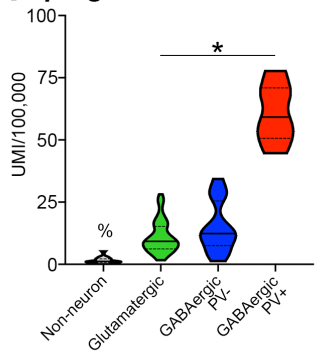**B** PV-INS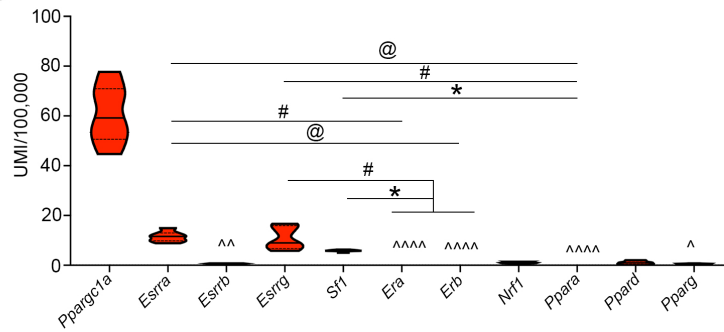**C** *Esrra*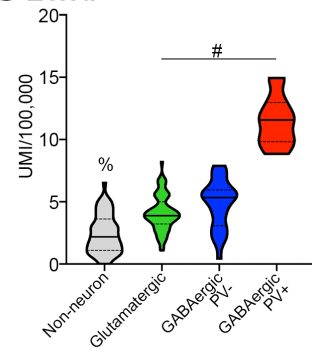**D** *Esrrb*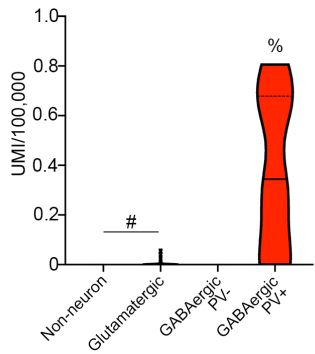**E** *Esrrg*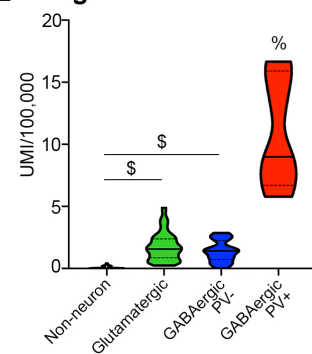**F** *Esr1*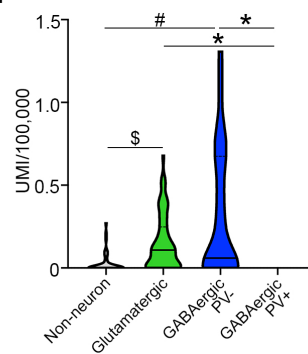**G** *Sf1*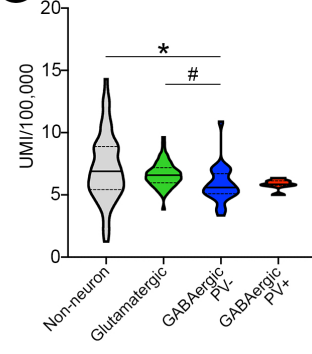**H** *Nrf1*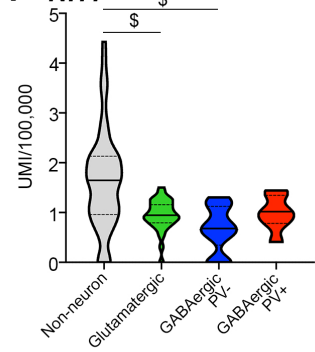**I** *Ppara*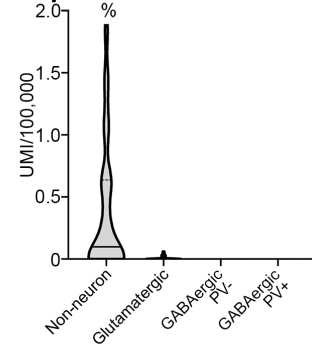**J** *Ppard*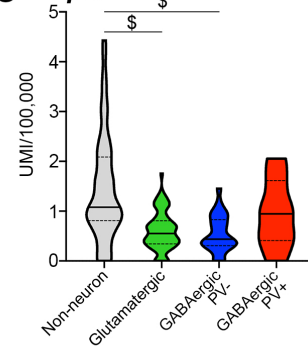**K** *Pparg*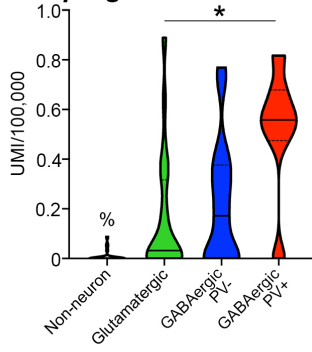**L**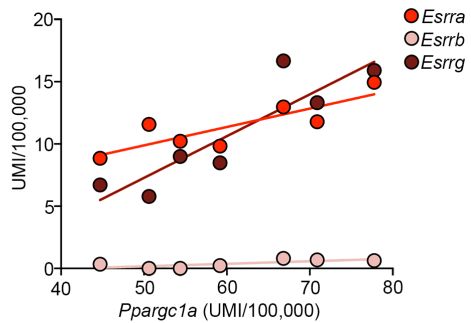**M**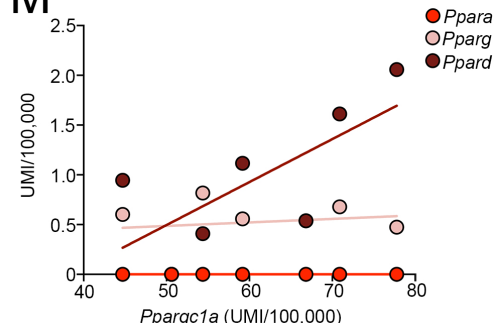**N**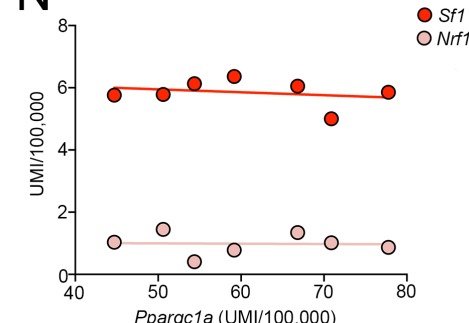

Supplement: NIHMS1757131-supplement-1.pdf [file NIHMS1757131-supplement-1.pdf]

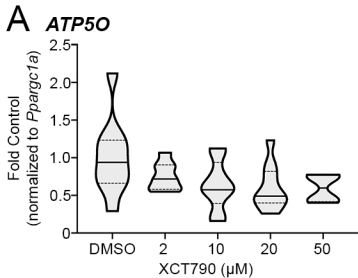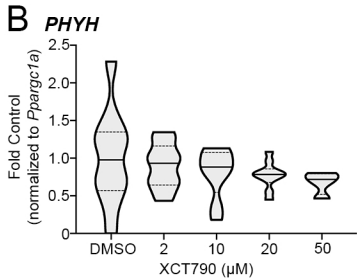

Supplement: NIHMS1757131-supplement-2.pdf [file NIHMS1757131-supplement-2.pdf]

**A** *Maoa*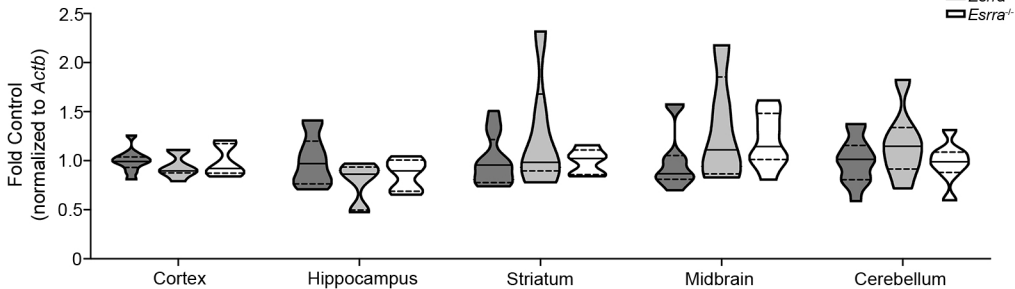**B** *Maob*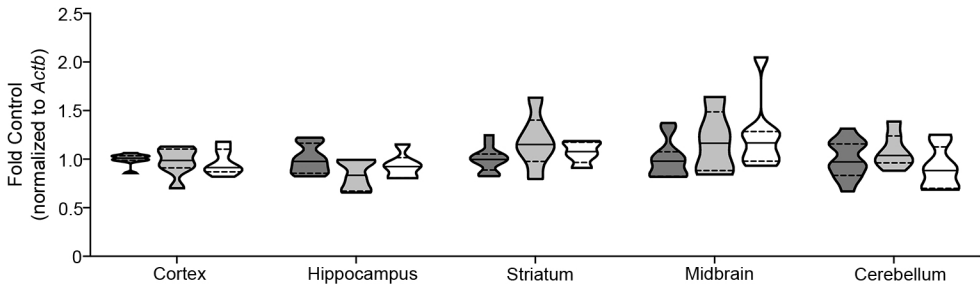

Supplement: NIHMS1757131-supplement-3.pdf [file NIHMS1757131-supplement-3.pdf]
